# Supplementary material
Source: PubMed Central journal article supplement (PMC3448018)
Supplement: NIHMS379308-supplement-1_si_001.pdf [file NIHMS379308-supplement-1_si_001.pdf]

Supporting Information for

NXL104 Irreversibly Inhibits the  $\beta$ -Lactamase from *Mycobacterium tuberculosis*

*Hua Xu, Saugata Hazra, and John S. Blanchard\**

Department of Biochemistry, Albert Einstein College of Medicine, 1300 Morris Park Avenue,  
Bronx New York 10461

\* To whom correspondence should be addressed: Department of Biochemistry, Albert Einstein College of Medicine, Bronx, NY 10461. Telephone: (718) 430-3096. Fax: (718) 430-8565. E-mail: blanchar@aecom.yu.edu.

**Table S1.** Summary of protein-ligand interactions.

| Protein (BlaC)      |           |           | Clav | Dist <sup>a</sup> | Protein (BlaC) |           |           | NXL104 | Dist <sup>a</sup> |
|---------------------|-----------|-----------|------|-------------------|----------------|-----------|-----------|--------|-------------------|
| Residue             | Atom name | Atom name |      |                   | Residue        | Atom name | Atom name |        |                   |
| Ser84               | N         | OAH       | 2.8  |                   | Ser70          | N         | OAC       | 2.6    |                   |
| Thr253              | N         | OAH       | 2.9  |                   | Ser128         | OG        | OAL       | 3.0    |                   |
| Asn186              | ND2       | NAK       | 3.5  |                   | Thr237         | OG1       | OAE       | 3.0    |                   |
| Glu182              | OE1       | NAK       | 4.4  |                   | Thr237         | OG1       | OAG       | 3.3    |                   |
| Ile117              | N         | NAK       | 5.6  |                   | Thr239         | O         | NAA       | 3.1    |                   |
| PO <sub>4</sub> 309 | O4        | OAN       | 4.1  |                   | Thr239         | O         | OAC       | 2.8    |                   |
| PO <sub>4</sub> 309 | O3        | OAN       | 4.4  |                   | Thr239         | N         | OAC       | 2.8    |                   |
| PO <sub>4</sub> 308 | O2        | OAQ       | 3.1  |                   | Thr239         | OG1       | OAE       | 3.5    |                   |
| Asp255              | N         | OAQ       | 3.6  |                   | Thr239         | OG1       | OAD       | 2.9    |                   |
| PO <sub>4</sub> 308 | O1        | OAQ       | 4.1  |                   | HOH492         | O         | NAK       | 3.2    |                   |
| HOH516              | O         | OAN       | 2.4  |                   | HOH508         | O         | OAD       | 3.5    |                   |

|        |   |     |     |        |   |     |     |
|--------|---|-----|-----|--------|---|-----|-----|
| HOH583 | O | NAK | 3.1 | HOH508 | O | OAG | 3.1 |
|        |   |     |     | HOH541 | O | CAN | 2.8 |
|        |   |     |     | HOH541 | O | O   | 2.9 |
|        |   |     |     | HOH541 | O | N   | 3.1 |
|        |   |     |     | HOH541 | O | OAC | 3.1 |
|        |   |     |     | HOH772 | O | OAC | 3.2 |
|        |   |     |     | HOH772 | O | OAE | 1.7 |
|        |   |     |     | HOH772 | O | OAL | 2.3 |
|        |   |     |     | HOH737 | O | OAE | 3.4 |
|        |   |     |     | HOH737 | O | OAG | 2.6 |

---

<sup>a</sup> Distance (Å) between the ligand and protein atoms

---
